# Supplementary material
Source: PubMed Central journal article supplement (PMC5710268)

## Supplementary Online Content

Berkowitz SA, Seligman HK, Rigdon J, Meigs JB, Basu S. Supplemental Nutrition Assistance Program (SNAP) Participation and Health Care Expenditures Among Low-Income Adults. *JAMA Intern Med*. Published online September 25, 2017. doi:10.1001/jamainternmed.2017.4841

**eAppendix.** Technical appendix and sensitivity analyses

**eTable 1.** Generalized Linear Regression, full model

**eTable 2.** Tests of IV

**eTable 3.** List of included states

**eTable 4.** post-‘Near/Far’ matching demographics, by ‘encouragement’ status

**eTable 5.** post-‘Near/Far’ Matching Two stage residual inclusion model

**eTable 6.** Balance statistics and overidentifying restrictions test for augmented inverse probability weighted analyses

**eTable 7.** Auxiliary equations for augmented inverse probability weighting analyses

**eReferences.**

**eFigure 1.** Change in estimated difference between participating and not participating in SNAP, in a series of nested models to explore potential confounders

This supplementary material has been provided by the authors to give readers additional information about their work.

## eAppendix: Technical Appendix and Sensitivity Analyses

### *Near/Far Matching*

A major concern in evaluating the effect of SNAP participation on healthcare expenditures is selection bias—those who choose to enroll in SNAP may be different from similarly eligible individuals who do not. Some of that difference is likely due to observable factors such as age, income, health insurance, and illness, but other factors that drive enrollment may remain unobserved. To address selection bias, we used an instrumental variable approach called near/far matching.<sup>1-3</sup> Instrumental variable analysis uses instruments to help overcome issues of selection bias related unobservable factors. A suitable instrument is one that a) influences receipt of the treatment, and b) where all causal pathways between the instrument and the outcome, other than through the treatment of interest, can be blocked or do not exist. In other words, an instrument should, conditional on observable factors, affect the outcome only by influencing the receipt of the treatment. This functions analogously to treatment allocation in a randomized clinical trial. In this study, our instruments were policy variables that make it easier or harder to enroll in SNAP when one is eligible. While SNAP eligibility is broadly similar at a national level, SNAP is administered by each state, and differences in state policy, such as the presence of an online application, or the requirement to provide fingerprints when enrolling, can influence the ease of SNAP enrollment. In this sense, these instruments serve as ‘nudges’, or forms of ‘encouragement’ or ‘discouragement’, that may help or hinder an eligible individual considering applying for SNAP. Because state-level variation in how easy or hard it is to sign up for SNAP should influence whether one signs up for SNAP, but should not otherwise be related to healthcare expenditures, conditional on observable features about the states and individuals, these policy variations are theoretically justified instruments. These policies were abstracted from the SNAP policy database<sup>4</sup> and in effect over the 2011 NHIS survey recall period. The policies used were 1) an option for online submission of a SNAP application, 2) presence of a broad-based categorical eligibility policy (which extends SNAP eligibility to those eligible for other assistance programs, such as Supplemental Security Income (SSI)), and 3) whether the state uses simplified reporting requirements for households with earnings (which reduces the burden of qualification paperwork).<sup>4</sup> Further, these instruments have been used and validated in prior studies of SNAP.<sup>5,6</sup> The ‘near/far’ matching type of instrumental variable analysis combines elements of nearest neighbor matching and traditional instrumental variable techniques. Using a probabilistic simulated annealing algorithm<sup>7</sup> that finds the optimal nonbipartite match<sup>8</sup>, and prior to examining the outcome, study participants are matched, using the Mahalanobis distance of the vector of their covariates, to be as similar as possible (‘near’) on observable characteristics that may influence the outcome, but as dissimilar as possible (‘far’) on the values of the instrument.<sup>3</sup> This essentially filters a cohort to reveal its most informative pairs—those who are sociodemographically and clinically as similar as possible, but who differ on whether they were ‘encouraged’ or ‘discouraged’ to enroll in SNAP. This design uses differences in receipt of ‘encouragement’ to enroll in SNAP to yield an effect estimate for SNAP receipt that is not confounded by unmeasured factors which influence both SNAP receipt and healthcare expenditures, and thus mirrors a matched-pairs randomized clinical trial.

To test the instrumental variables, we examined their association with SNAP receipt in a logistic regression model and checked they were not correlated with other state-level factors that may affect the outcome, such as per beneficiary Medicaid expenditures<sup>9</sup> or state Temporary Aid to Needy Families

benefit generosity.<sup>10</sup> We conducted Sargan and Basman tests of overidentifying restrictions, which test whether the residuals in the first stage model are correlated with the instruments (they should be uncorrelated to be valid instruments). Because weak instruments can lead to biased effect estimates, we also evaluated the first-stage statistic of the instruments, using a cut-off > 13 to indicate a sufficiently strong instrument. Finally, we conducted the Durbin-Wu-Hausman test for endogeneity, to determine whether instrumental variable methods were truly needed. To examine the precision of the match, we evaluated absolute standardized differences between the means of the covariates in those ‘encouraged’ vs. ‘discouraged’ to enroll in SNAP. An absolute standardized difference > 0.2 represented a concerning imbalance in matching.

### *Tests of instrumental variable assumptions*

For our instrumental variable (IV), an index of SNAP policies in place in a given state as of 1/1/2010 (i.e. in place at the beginning of the lookback period regarding SNAP receipt in 2011 NHIS), weighted by their partial f-statistic from a model predicting SNAP receipt, we conducted several tests of the instrumental variable assumptions, summarized in the table below. Because our IV used state level SNAP policy information, we wanted to examine other state level factors that may be correlated with the IV, to lend confidence to the assumption that the IV is associated with the outcome only through receipt of SNAP (we also adjusted for state-level fixed effects in both stages of the IV analysis to account for this as well). We first calculated an intraclass correlation (ICC) between individual-level healthcare expenditures and the states those individuals lived in. This revealed that that state of residence, apart from individual-level factors like health insurance or SNAP receipt, explained little variation in healthcare expenditures—only 0.6% (95% confidence interval 0.3% to 1.2%). We next examined whether the IV was correlated with state level Medicaid spending per beneficiary, using Medicaid expenditure data from the Kaiser Family Foundation, or maximum Temporary Aid for Needy Families (TANF) benefit for a single parent caring for 2 children, an indicator of state TANF generosity. Unlike SNAP where benefits are set at the federal level, states have broad leeway in setting TANF levels, and so this can indicate the ‘generosity’ of TANF, and potentially other, social service programs in the state. Using Spearman correlations, the IV was weakly and not statistically significantly correlated with these factors, giving confidence in the idea that the IV operated through SNAP receipt and not other state level factors.

Next, we conducted tests of the instrument itself, assessing whether it was associated with receipt of SNAP in a logistic regression model that included the other covariates adjusted for in our main analysis and accounted for the survey design information. We also assessed the first-stage partial deviance statistic, both before and after the ‘near/far’ match, in order to determine the strength of the instrument (< 13 would indicate an instrument too weak to use). We also used overidentification tests to help assess the validity of the instruments (for this test, higher p-values are better, with  $p < 0.05$  indicating potentially invalid instruments). The instrument met all these tests.

Finally, we calculated tests of endogeneity, which indicate whether IV analysis is truly needed, although, owing to questions regarding the power of these tests, some experts recommend proceeding with IV analysis even if the endogeneity tests do not suggest the need for IV analysis (which could be

interpreted as a false negative situation). For these tests, a p-value < 0.05 generally indicates a 'positive' result, i.e., that IV analysis is needed. Interestingly, the endogeneity tests indicated that IV methods may not be needed, which suggests the 'standard' regression model may have adequately accounted for confounding on its own.

#### Statistical analysis

In addition to variables used in the standard regression, the near/far analysis included information on per-enrollee state healthcare expenditures in the year prior to MEPS<sup>11</sup>, to help account for other state-level factors that would be reflected in participants' healthcare expenditures. After creation of the matched cohort, we performed an instrumental variable analysis using the two-stage residual inclusion (2SRI) approach<sup>12,13</sup>, adjusting for covariates, with a logit model to estimate SNAP receipt, a gamma regression model to estimate expenditures, and bias-corrected bootstrapped confidence intervals (500 replications). The near/far analysis was conducted on those residing in the 29 most-populous states, as AHRQ does not release state-level codes for the other states owing to privacy concerns (eTable 3 for list of included states). Survey design information could not be incorporated into the near/far analysis

#### Summary of Near/Far Analysis Results

For the near/far matching analysis, our instrument was strongly associated with participation in SNAP, and passed tests of overidentifying restrictions. Interestingly, endogeneity tests suggested that instrumental variable methods may not have been needed (p=0.72). The near/far match resulted in 3676 participants who comprised 1838 matched pairs (Figure 1), and the instrument was strong (first-stage partial deviance statistic: 42.5) (eTable 2). Analyses using the 2SRI method, adjusted for the same factors as the standard regression, and state spending, demonstrated lower expenditures for SNAP receipt (-\$5,160 per year; 95% CI -\$6,924 to -\$438) (full model in eTable 5).

## Augmented Inverse Probability Weighting

As an alternative to the instrumental variable-based analysis, we conducted an analysis using augmented inverse probability weighting (AIPW) (see Technical Appendix for more detail). a ‘doubly-robust’ technique to mitigate selection bias by estimating the likelihood of receiving SNAP and then using response-weights to achieve balance in measured covariates between the group that did and did not receive SNAP.<sup>14</sup> This approach does not rely on instrumental variable assumptions, but may not be able to achieve balance on unmeasured confounders. To justify this approach, we examined post-weighting balance between covariates and conducted tests of overidentifying restrictions, which are tests of covariate balance between the treated and untreated groups.<sup>15</sup> We again calculated replication based confidence intervals (bias-corrected confidence intervals using 500 bootstrap replications). Survey design information could not be incorporated into the AIPW analysis.

### Summary of AIPW Results

AIPW analyses, conducted on the entire cohort, successfully balanced observed factors (eTable 6), and passed tests of overidentifying restrictions. The AIPW analysis estimated the average treatment effect of SNAP enrollment to be -\$931 (95% CI -\$2,026 to -\$152) (full model in eTable 7), again representing lower yearly expenditures with SNAP participation.

eTable 1: Generalized Linear Regression, full model

|                         | $\beta$   | Standard Error | P      | 95% CI Lower | 95% CI Upper |
|-------------------------|-----------|----------------|--------|--------------|--------------|
| SNAP                    | -0.27671  | 0.123321       | 0.026  | -0.5199288   | -0.03348     |
| Age                     | -0.00761  | 0.019378       | 0.695  | -0.0458239   | 0.030613     |
| Age Squared             | 0.000125  | 0.000186       | 0.504  | -0.0002423   | 0.000492     |
| Female                  | 0.485189  | 0.119815       | <.0001 | 0.248882     | 0.721496     |
| Race/ethnicity          |           |                |        |              |              |
| Non-Hispanic White      | Reference | --             | --     | --           | --           |
| Non-Hispanic Black      | -0.23553  | 0.128266       | 0.068  | -0.4885058   | 0.017444     |
| Hispanic                | -0.26699  | 0.158689       | 0.094  | -0.5799668   | 0.045987     |
| Asian/multi-/other      | -0.40676  | 0.210805       | 0.055  | -0.8225273   | 0.008999     |
| % Federal Poverty Level | 0.050526  | 0.03032        | 0.097  | -0.0092732   | 0.110325     |
| Rural                   | 0.346176  | 0.197889       | 0.082  | -0.044113    | 0.736466     |
| Northeast               | 0.167307  | 0.151833       | 0.272  | -0.1321491   | 0.466763     |
| Midwest                 | 0.383049  | 0.179933       | 0.035  | 0.0281737    | 0.737925     |
| South                   | 0.085328  | 0.142547       | 0.55   | -0.195812    | 0.366469     |
| Died                    | 0.951147  | 0.460975       | 0.04   | 0.0419825    | 1.860312     |
| Insurance               |           |                |        |              |              |
| Private                 | 0.608314  | 0.180358       | 0.001  | 0.252599     | 0.964028     |
| Medicare                | 0.39253   | 0.17477        | 0.026  | 0.0478369    | 0.737223     |
| Other Public            | 0.81397   | 0.128968       | <.0001 | 0.5596103    | 1.06833      |
| Uninsured               | Reference | --             | --     | --           | --           |
| Educational Attainment  |           |                |        |              |              |
| < High School Diploma   | Reference | --             | --     | --           | --           |
| High School Diploma     | 0.007068  | 0.134297       | 0.958  | -0.2578015   | 0.271937     |
| > High School Diploma   | 0.095854  | 0.150446       | 0.525  | -0.2008652   | 0.392573     |
| Obese                   | -0.00772  | 0.111718       | 0.945  | -0.2280609   | 0.212616     |
| HTN                     | 0.282779  | 0.108835       | 0.01   | 0.0681267    | 0.497432     |
| Stroke                  | 0.191746  | 0.180082       | 0.288  | -0.1634246   | 0.546917     |
| CAD                     | 0.782025  | 0.150553       | <.0001 | 0.4850943    | 1.078955     |
| Diabetes                | 0.646371  | 0.123672       | <.0001 | 0.4024565    | 0.890286     |
| Arthritis               | 0.585317  | 0.127068       | <.0001 | 0.3347054    | 0.835928     |
| COPD                    | 0.276941  | 0.240333       | 0.251  | -0.1970601   | 0.750943     |
| Disability              | 0.515666  | 0.115145       | <.0001 | 0.288569     | 0.742762     |

Results from a generalized linear model with gamma distribution and log link, accounting for survey design information, and adjusted for all variables in table

eTable 2: Tests of IV

|                                                                                                         | Result                           |
|---------------------------------------------------------------------------------------------------------|----------------------------------|
| Intraclass correlation between individual healthcare expenditures grouped by state of residence in MEPS | 0.0061 (95% CI 0.0029 to 0.0129) |
| Spearman Correlation between instrumental variable and Medicaid spending per beneficiary <sup>a</sup>   | 0.10592<br>(p=0.464)             |
| Spearman Correlation between instrumental variable and maximum TANF benefit <sup>b</sup>                | 0.11265<br>(p= 0.436)            |
|                                                                                                         |                                  |
| First-stage Partial Deviance Statistic, before 'near/far' match                                         | 33.2                             |
| First-stage Partial Deviance Statistic, after 'near/far' match                                          | 42.5                             |
| Overidentifying                                                                                         |                                  |
| Sargan (2SLS)                                                                                           | p = 0.307                        |
| Basmann (2SLS)                                                                                          | p = 0.310                        |
| Endogeneity                                                                                             |                                  |
| Durbin (2SLS)                                                                                           | p = 0.724                        |
| Wu-Hausman F (2SLS)                                                                                     | p = 0.725                        |
| Residual (2SRI)                                                                                         | p = 0.298                        |

<sup>a</sup>Medicaid data from Kaiser Family Foundation <http://kff.org/medicaid/state-indicator/medicaid-spending-per-enrollee/view/print/?currentTimeframe=0&print=true>

<sup>b</sup>TANF data from Congressional Research Service TANF report [http://greenbook.waysandmeans.house.gov/sites/greenbook.waysandmeans.house.gov/files/R43634\\_gb\\_0.pdf](http://greenbook.waysandmeans.house.gov/sites/greenbook.waysandmeans.house.gov/files/R43634_gb_0.pdf)

eTable 3: List of included states

|                |
|----------------|
| Alabama        |
| Arizona        |
| California     |
| Colorado       |
| Connecticut    |
| Florida        |
| Georgia        |
| Illinois       |
| Indiana        |
| Kentucky       |
| Louisiana      |
| Massachusetts  |
| Maryland       |
| Michigan       |
| Minnesota      |
| Missouri       |
| North Carolina |
| New Jersey     |
| New York       |
| Ohio           |
| Oklahoma       |
| Oregon         |
| Pennsylvania   |
| South Carolina |
| Tennessee      |
| Texas          |
| Virginia       |
| Washington     |
| Wisconsin      |



eTable 4: post-‘Near/Far’ matching demographics, by ‘encouragement’ status

|                                                    | ‘Discouraged’<br>% (n) or mean (SE)<br>N=1838 | ‘Encouraged’<br>% (n) or mean (SE)<br>N=1838 | Absolute<br>Standardized<br>Difference |
|----------------------------------------------------|-----------------------------------------------|----------------------------------------------|----------------------------------------|
| Age (y)                                            | 40.77693<br>(.3959409)                        | 40.38901<br>(.382705)                        | 0.0232383                              |
| Female                                             | 58.81 (1,081)                                 | 58.54 (1,076)                                | 0.0055231                              |
| Race/Ethnicity                                     |                                               |                                              |                                        |
| Non-Hispanic White                                 | 21.82 (401)                                   | 21.49 (395)                                  | 0.0079234                              |
| Non-Hispanic Black                                 | 25.84 (475)                                   | 25.84 (475)                                  | 0.0000000                              |
| Hispanic                                           | 45.38 (834)                                   | 45.65 (839)                                  | 0.0054613                              |
| Asian/multi-/other                                 | 6.96 (128)                                    | 7.02 (129)                                   | n/a                                    |
| Educational Attainment                             |                                               |                                              |                                        |
| < High School Diploma                              | 6.64 (122)                                    | 5.98 (110)                                   | n/a                                    |
| High School Diploma                                | 61.70 (1,134)                                 | 62.51 (1,149)                                | 0.0168186                              |
| > High School Diploma                              | 31.66 (582)                                   | 31.50 (579)                                  | 0.0035103                              |
| Income*                                            | 3.829706<br>(.0451396)                        | 3.818825<br>(.0446944)                       | 0.0056506                              |
| Census Region                                      |                                               |                                              |                                        |
| Northeast                                          | 15.18 (279)                                   | 19.80 (364)                                  | 0.1219256                              |
| Midwest                                            | 14.31 (263)                                   | 15.45 (284)                                  | 0.0320989                              |
| South                                              | 41.57 (764)                                   | 41.19 (757)                                  | 0.0077308                              |
| West                                               | 28.94 (532)                                   | 23.56 (433)                                  | n/a                                    |
| Rural Residence                                    | 11.53 (212)                                   | 11.59 (213)                                  | 0.0017010                              |
| Insurance                                          |                                               |                                              |                                        |
| Private                                            | 18.99 (349)                                   | 18.50 (340)                                  | 0.0125440                              |
| Medicare                                           | 8.65 (159)                                    | 8.11 (149)                                   | 0.0196323                              |
| Other Public                                       | 29.92 (550)                                   | 30.25 (556)                                  | 0.0071158                              |
| Uninsured                                          | 42.44 (780)                                   | 43.14 (793)                                  | n/a                                    |
| Died                                               | 0.71 (13)                                     | 0.33 (6)                                     | 0.0531158                              |
| Disabled                                           | 13.44 (247)                                   | 13.28 (244)                                  | 0.0047967                              |
| Obesity                                            | 34.49 (634)                                   | 34.98 (643)                                  | 0.0102813                              |
| Hypertension                                       | 34.49 (634)                                   | 34.49 (634)                                  | 0.0000000                              |
| Heart Disease                                      | 10.55 (194)                                   | 10.17 (187)                                  | 0.0095687                              |
| Diabetes                                           | 13.60 (250)                                   | 13.28 (244)                                  | 0.0124919                              |
| Stroke                                             | 3.81 (70)                                     | 3.92 (72)                                    | 0.0056450                              |
| Arthritis                                          | 24.05 (442)                                   | 24.21 (445)                                  | 0.0200404                              |
| COPD                                               | 2.01 (37)                                     | 1.74 (32)                                    | 0.0038137                              |
| 2011 State adjusted per capita healthcare spending | 9892.758<br>(20.30371)                        | 9858.425<br>(21.61006)                       | 0.0381945                              |

n/a = not directly calculated due to ‘dummy’ coding categorical variables for the matching process

\*The National Health Interview Survey arranges income in ordinal categories, corresponding to percentage of federally poverty level. Category 3 corresponds to income between 75 and 99% of the federal poverty level, and category 4 corresponds to income 100% to 124% of the federal poverty level. Therefore the mean post-match income was a little less than 100% of the federal poverty level in both groups.

eTable 5: post-‘Near/Far’ Matching Two stage residual inclusion model

|                                                                                                             | $\beta$ Coefficient | Lower 95% Confidence Interval | Upper 95% Confidence Interval |
|-------------------------------------------------------------------------------------------------------------|---------------------|-------------------------------|-------------------------------|
| First Stage Model: Logistic Regression of SNAP receipt                                                      |                     |                               |                               |
| Age                                                                                                         | 0.0142              | -0.0115                       | 0.0399                        |
| Age squared                                                                                                 | -0.0004             | -0.0007                       | -0.0002                       |
| State 2011 Per Enrollee Medicare Spending, \$                                                               | 0.0000              | -0.0002                       | 0.0001                        |
| Female                                                                                                      | 0.2613              | 0.0992                        | 0.4233                        |
| Non-Hispanic White Race/ethnicity                                                                           | 0.4694              | 0.1037                        | 0.8351                        |
| Non-Hispanic Black Race/ethnicity                                                                           | 1.1213              | 0.7586                        | 1.4839                        |
| Hispanic Race/ethnicity                                                                                     | 0.3142              | -0.0214                       | 0.6497                        |
| Private Insurance                                                                                           | -0.6542             | -0.8964                       | -0.4119                       |
| Medicare Insurance                                                                                          | 0.0715              | -0.3213                       | 0.4644                        |
| Other Public Insurance                                                                                      | 1.1540              | 0.9552                        | 1.3529                        |
| High School Diploma Education                                                                               | -0.3704             | -0.5654                       | -0.1755                       |
| > High School Diploma Education                                                                             | -0.1971             | -0.4068                       | 0.0126                        |
| Income as % Federal Poverty Level                                                                           | -0.3569             | -0.4011                       | -0.3127                       |
| Rural Residence                                                                                             | 0.1675              | -0.0858                       | 0.4208                        |
| Northeast Residence                                                                                         | -0.3328             | -0.7195                       | 0.0539                        |
| Midwest Residence                                                                                           | 0.2125              | -0.1703                       | 0.5954                        |
| South Residence                                                                                             | -0.1061             | -0.4834                       | 0.2712                        |
| Obesity                                                                                                     | 0.2084              | 0.0347                        | 0.3822                        |
| Hypertension                                                                                                | 0.1525              | -0.0602                       | 0.3651                        |
| Heart Disease                                                                                               | 0.0500              | -0.2236                       | 0.3235                        |
| Diabetes                                                                                                    | 0.2790              | -0.0142                       | 0.5722                        |
| Stroke                                                                                                      | 0.2807              | -0.2074                       | 0.7688                        |
| Chronic Obstructive Pulmonary Disease                                                                       | 0.2601              | -0.3910                       | 0.9112                        |
| Arthritis                                                                                                   | 0.1422              | -0.0987                       | 0.3830                        |
| Died during Study Period                                                                                    | -0.7316             | -2.3483                       | 0.8852                        |
| Disability                                                                                                  | 0.3289              | 0.0656                        | 0.5922                        |
| Instrumental Variable                                                                                       | 1.4581              | 0.9869                        | 1.9292                        |
| Model Constant                                                                                              | -0.3197             | -1.5501                       | 0.9108                        |
| Second Stage Model: Generalized Linear Regression (gamma distribution, log link) of healthcare expenditures |                     |                               |                               |
| SNAP                                                                                                        | -1.2351             | -3.0280                       | -0.0621                       |
| Age                                                                                                         | 0.0061              | -0.0294                       | 0.0399                        |
| Age squared                                                                                                 | 0.0000              | -0.0003                       | 0.0004                        |
| State Per Enrollee Medicare Spending, 2011                                                                  | -0.0002             | -0.0003                       | 0.0000                        |

|                                       |         |         |        |
|---------------------------------------|---------|---------|--------|
| Female                                | 0.6574  | 0.3430  | 0.8615 |
| Non-Hispanic White                    | 0.7511  | 0.3691  | 1.2103 |
| Non-Hispanic Black                    | 0.5601  | 0.0799  | 1.0856 |
| Hispanic                              | 0.3191  | -0.0587 | 0.7435 |
| Private                               | 0.4280  | 0.1149  | 0.7983 |
| Medicare                              | 0.4248  | 0.0915  | 0.7296 |
| Other Public                          | 0.8785  | 0.5181  | 1.2937 |
| High School Diploma                   | 0.1258  | -0.1096 | 0.4020 |
| > High School Diploma                 | 0.0897  | -0.2050 | 0.4377 |
| Income as % Federal Poverty Level     | -0.0221 | -0.1605 | 0.0846 |
| Rural Residence                       | 0.2456  | -0.1510 | 0.6638 |
| Northeast Residence                   | 0.4307  | 0.0987  | 0.7975 |
| Midwest Residence                     | 0.4780  | 0.0610  | 0.9860 |
| South Residence                       | 0.5131  | 0.0150  | 0.9322 |
| Obesity                               | 0.0069  | -0.2288 | 0.2218 |
| Hypertension                          | 0.5043  | 0.2507  | 0.7608 |
| Heart Disease                         | 0.6915  | 0.4489  | 0.9852 |
| Diabetes                              | 0.6533  | 0.3667  | 0.9212 |
| Stroke                                | 0.3270  | -0.1061 | 0.6790 |
| Chronic Obstructive Pulmonary Disease | 0.1917  | -0.2836 | 0.5181 |
| Arthritis                             | 0.3328  | 0.0927  | 0.5476 |
| Died during Study Period              | -0.8834 | -2.2756 | 0.1852 |
| Disability                            | 0.6606  | 0.4300  | 0.9515 |
| First Stage Residual                  | 0.7731  | -0.3715 | 2.5608 |
| Model Constant                        | 8.0036  | 6.3549  | 9.7676 |

NB: Regression parameters in gamma regression models can be exponentiated to give the ratio between the mean of the outcome in the group of interest divided by the mean of the outcome in the control group. To aid interpretation, we then used the predicted margins command to convert this to a 2 year total cost difference, and then annualized the estimate by dividing in half. Because the predictive margins command uses a delta-method standard error, and we thought the bias-corrected bootstrap method would give more accurate results in this case, the 95% Confidence Intervals for the predictive margins were calculated by taking the mean of the reference level (in this case, no SNAP), and multiplying it by the exponentiated form of the lower and upper bounds of the 95% confidence interval

eTable 6: Balance statistics and overidentifying restrictions test for augmented inverse probability weighted analyses

|                                        | Standardized differences<br>(values closer to 0 represent better balance) |           | Variance ratio<br>(values closer to 1 represent better balance) |          |
|----------------------------------------|---------------------------------------------------------------------------|-----------|-----------------------------------------------------------------|----------|
|                                        | Raw                                                                       | Weighted  | Raw                                                             | Weighted |
| Age                                    | -.1904464                                                                 | .040384   | .8136129                                                        | 1.096444 |
| Age squared                            | -.20052                                                                   | .0517001  | .7360837                                                        | 1.186927 |
| Female                                 | .1865776                                                                  | .0056819  | .9356206                                                        | .9983576 |
| Race/Ethnicity                         |                                                                           |           |                                                                 |          |
| Non-Hispanic White                     |                                                                           |           |                                                                 |          |
| Non-Hispanic Black                     | .4066883                                                                  | .0135829  | 1.557532                                                        | 1.014918 |
| Hispanic                               | -.1369969                                                                 | -.0126716 | .9533653                                                        | .9954143 |
| Asian/multi-/other                     | -.1906064                                                                 | .0650038  | .5186053                                                        | 1.210807 |
| Educational Attainment                 |                                                                           |           |                                                                 |          |
| < High School Diploma                  |                                                                           |           |                                                                 |          |
| High School Diploma                    | .0295217                                                                  | -.0061007 | 1.023929                                                        | .9949781 |
| > High School Diploma                  | -.2310974                                                                 | -.0266195 | .8296893                                                        | .9795665 |
| Income (as % of federal poverty level) | -.7753642                                                                 | .0140216  | .8544885                                                        | 1.025691 |
| Census Region                          |                                                                           |           |                                                                 |          |
| Northeast                              | .0827734                                                                  | .0045639  | 1.162505                                                        | 1.008478 |
| Midwest                                | .1117232                                                                  | -.0083641 | 1.228365                                                        | .9844889 |
| South                                  | .0879722                                                                  | -.0287469 | 1.032809                                                        | .9882156 |
| West                                   |                                                                           |           |                                                                 |          |
| Rural Residence                        | .1197136                                                                  | -.0242665 | 1.265335                                                        | .9527688 |
| Insurance                              |                                                                           |           |                                                                 |          |
| Private                                | -.4253892                                                                 | -.0094037 | .4864964                                                        | .986345  |
| Medicare                               | -.2158266                                                                 | .0549826  | .5225464                                                        | 1.152112 |
| Other Public                           | .6797021                                                                  | -.0017013 | 1.699563                                                        | .9984802 |
| Uninsured                              |                                                                           |           |                                                                 |          |
| Died during study period               | -.0376257                                                                 | .0084814  | .6128734                                                        | 1.105798 |
| Obesity                                | .1753457                                                                  | -.0081076 | 1.116208                                                        | .9944992 |
| Hypertension                           | .1523917                                                                  | -.0059545 | 1.092679                                                        | .9963328 |
| Heart Disease                          | .0792404                                                                  | -.0158846 | 1.17876                                                         | .9669949 |
| Diabetes                               | .0824979                                                                  | .0001572  | 1.224196                                                        | 1.000359 |
| Asthma                                 | .2196648                                                                  | -.0007727 | 1.711926                                                        | .9980225 |
| Cancer                                 | -.0266049                                                                 | -.0119199 | .9123387                                                        | .9575479 |
| Chronic Obstructive Pulmonary Disease  | .0967024                                                                  | .0026392  | 1.904168                                                        | 1.018058 |
| Arthritis                              | .1196742                                                                  | -.0078693 | 1.14302                                                         | .9911282 |
|                                        |                                                                           |           |                                                                 |          |
| Overidentification test <sup>a</sup>   | P=0.7111                                                                  |           |                                                                 |          |

<sup>a</sup>null hypothesis is that covariates are balanced so higher p-values represents less evidence to reject null

eTable 7: Auxiliary equations for augmented inverse probability weighting analyses

|                                                  | $\beta$ Coefficient | Lower 95% Confidence Interval | Upper 95% Confidence Interval |
|--------------------------------------------------|---------------------|-------------------------------|-------------------------------|
| <b>Average Treatment Effect Estimate</b>         |                     |                               |                               |
| SNAP (compared with No SNAP) (two-year estimate) | -1861.15            | -4052.11                      | -304.37                       |
| <b>Potential Outcome Mean Estimate</b>           |                     |                               |                               |
| No SNAP (two-year estimate)                      | 8291.55             | 6827.60                       | 10224.87                      |
| <b>Auxiliary Equations</b>                       |                     |                               |                               |
| <i>Untreated Potential Outcome Equation</i>      |                     |                               |                               |
| Age                                              | -41.90              | -362.72                       | 189.14                        |
| Age squared                                      | 0.14                | -2.42                         | 4.38                          |
| Female                                           | 569.09              | -1914.33                      | 2551.68                       |
| Race/ethnicity                                   |                     |                               |                               |
| Non-Hispanic White                               | Referent            | --                            | --                            |
| Non-Hispanic Black                               | -460.40             | -3451.52                      | 2526.26                       |
| Hispanic                                         | -1183.46            | -3332.95                      | 985.32                        |
| Asian/multi-/other                               | 534.46              | -4019.92                      | 9652.16                       |
| Health Insurance                                 |                     |                               |                               |
| Uninsured                                        | Referent            | --                            | --                            |
| Private                                          | 1947.30             | -14.07                        | 4263.45                       |
| Medicare                                         | 15.98               | -5339.30                      | 4013.55                       |
| Other Public                                     | 3351.54             | 522.84                        | 7328.61                       |
| Income as % Federal Poverty Level                | -224.69             | -958.23                       | 217.98                        |
| Education                                        |                     |                               |                               |
| < High School Diploma                            | Referent            | --                            | --                            |
| High School Diploma                              | 1697.39             | -92.92                        | 3521.06                       |
| > High School Diploma                            | 2164.64             | 172.58                        | 4600.28                       |
| Rural Residence                                  | 221.96              | -2518.49                      | 4018.17                       |
| Northeast Residence                              | 974.21              | -1218.64                      | 3713.78                       |
| Midwest Residence                                | -132.17             | -2481.92                      | 3298.75                       |
| South Residence                                  | 597.76              | -1596.29                      | 4371.85                       |
| Obesity                                          | -11.27              | -2095.38                      | 1848.98                       |
| Hypertension                                     | 441.70              | -2652.54                      | 3198.17                       |
| Heart Disease                                    | 11638.60            | 6384.61                       | 20098.73                      |
| Diabetes                                         | 6345.61             | 2087.54                       | 10499.17                      |
| Asthma                                           | 1296.67             | -2562.33                      | 4963.15                       |

|                                           |          |           |           |
|-------------------------------------------|----------|-----------|-----------|
| Arthritis                                 | 4630.79  | 991.66    | 9943.60   |
| Cancer                                    | 5502.77  | 558.37    | 10932.25  |
| Chronic Obstructive Pulmonary Disease     | 4224.76  | -3763.91  | 17236.73  |
| Stroke                                    | -483.40  | -7335.07  | 4913.90   |
| Died during Study Period                  | 5345.19  | -6927.20  | 28733.24  |
| Disability                                | 8393.79  | 2850.37   | 16299.53  |
| Model Constant                            | 2064.63  | -4364.70  | 8973.98   |
|                                           |          |           |           |
| <i>Treated Potential Outcome Equation</i> |          |           |           |
| Age                                       | -466.70  | -921.48   | -124.87   |
| Age squared                               | 6.61     | 2.22      | 12.20     |
| Female                                    | 458.79   | -1614.58  | 2274.93   |
| Race/ethnicity                            |          |           |           |
| Non-Hispanic White                        | Referent | --        | --        |
| Non-Hispanic Black                        | -3978.39 | -6198.79  | -1231.65  |
| Hispanic                                  | -2125.77 | -4632.61  | 740.98    |
| Asian/multi-/other                        | 951.38   | -5914.88  | 12871.56  |
| Health Insurance                          |          |           |           |
| Uninsured                                 | Referent | --        | --        |
| Private                                   | 3571.15  | 727.53    | 7044.33   |
| Medicare                                  | -1143.65 | -6913.24  | 7461.07   |
| Other Public                              | 2974.45  | 1512.25   | 4738.22   |
| Income as % Federal Poverty Level         | -178.58  | -711.35   | 297.90    |
| Education                                 |          |           |           |
| < High School Diploma                     | Referent | --        | --        |
| High School Diploma                       | 112.63   | -1874.66  | 1971.42   |
| > High School Diploma                     | 426.10   | -1648.52  | 2847.93   |
| Rural Residence                           | 1843.96  | -1006.21  | 5692.62   |
| Northeast Residence                       | 2812.31  | -553.66   | 7230.71   |
| Midwest Residence                         | 361.45   | 2651.56   | 2827.96   |
| South Residence                           | -1164.34 | -3943.40  | 802.81    |
| Obesity                                   | -288.64  | -2115.48  | 1470.49   |
| Hypertension                              | 3452.02  | 1269.89   | 5729.02   |
| Heart Disease                             | 6879.11  | 2488.05   | 12294.64  |
| Diabetes                                  | 5166.46  | 1415.40   | 10535.20  |
| Asthma                                    | 718.91   | -1863.54  | 4336.88   |
| Arthritis                                 | 2682.16  | -1007.73  | 5661.81   |
| Cancer                                    | -585.02  | -5087.81  | 4439.41   |
| Chronic Obstructive Pulmonary Disease     | 220.88   | -6908.89  | 7995.38   |
| Stroke                                    | 6859.88  | -355.82   | 13156.78  |
| Died during Study Period                  | 39484.41 | -10719.36 | 102110.90 |

|                                          |          |         |          |
|------------------------------------------|----------|---------|----------|
| Disability                               | 6051.96  | 3209.58 | 9773.55  |
| Model Constant                           | 8704.02  | 1765.86 | 16364.06 |
| <i>Probability of Treatment Equation</i> |          |         |          |
| Age                                      | 0.01     | -0.01   | 0.02     |
| Age squared                              | 0.00     | 0.00    | 0.00     |
| Female                                   | 0.12     | 0.04    | 0.21     |
| Race/ethnicity                           |          |         |          |
| Non-Hispanic White                       | Referent | --      | --       |
| Non-Hispanic Black                       | 0.35     | 0.23    | 0.48     |
| Hispanic                                 | -0.07    | -0.19   | 0.05     |
| Asian/multi-/other                       | -0.24    | -0.44   | -0.08    |
| Health Insurance                         |          |         |          |
| Uninsured                                | Referent | --      | --       |
| Private                                  | -0.30    | -0.43   | -0.18    |
| Medicare                                 | 0.05     | 0.14    | 0.27     |
| Other Public                             | 0.67     | 0.56    | 0.77     |
| Income as % Federal Poverty Level        | -0.20    | -0.23   | -0.18    |
| Education                                |          |         |          |
| < High School Diploma                    | Referent | --      | --       |
| High School Diploma                      | -0.17    | -0.29   | -0.07    |
| > High School Diploma                    | -0.29    | -0.40   | -0.19    |
| Rural Residence                          | 0.17     | 0.04    | 0.30     |
| Northeast Residence                      | 0.23     | 0.10    | 0.38     |
| Midwest Residence                        | 0.39     | 0.22    | 0.54     |
| South Residence                          | 0.25     | 0.14    | 0.39     |
| Obesity                                  | 0.10     | 0.00    | 0.18     |
| Hypertension                             | 0.16     | 0.04    | 0.27     |
| Heart Disease                            | 0.02     | -0.12   | 0.15     |
| Diabetes                                 | 0.11     | -0.05   | 0.27     |
| Asthma                                   | 0.19     | 0.05    | 0.32     |
| Cancer                                   | -0.09    | -0.26   | 0.10     |
| Arthritis                                | 0.13     | 0.00    | 0.25     |
| Chronic Obstructive Pulmonary Disease    | 0.26     | -0.05   | 0.58     |
| Died during Study Period                 | -0.13    | 0.84    | 0.45     |
| Model Constant                           | 0.21     | -0.10   | 0.56     |

$\beta$  Coefficients are in 2-year dollars for outcome equations; for treatment equation they are from probit model used in estimating probability of receiving SNAP

## eReferences

1. Baiocchi M, Small DS, Yang L, Polsky D, Groeneveld PW. Near/far matching: a study design approach to instrumental variables. *Health services & outcomes research methodology*. Dec 2012;12(4):237-253.
2. Lorch SA, Baiocchi M, Ahlberg CE, Small DS. The differential impact of delivery hospital on the outcomes of premature infants. *Pediatrics*. Aug 2012;130(2):270-278.
3. Rigdon J, Baiocchi M, Basu S. Near-far Matching in R: The nearfar Package *Journal of Statistical Software* [in press]. 2017.
4. Service ER. SNAP Policy Database. 2016; <https://www.ers.usda.gov/data-products/snap-policy-database/>. Accessed 06 Jan 17.
5. Gregory C, Ploeg MV, Andrews M, Coleman-Jensen A. Supplemental Nutrition Assistance Program (SNAP) Participation Leads to Modest Changes in Diet Quality. *Economic Research Service: Economic Research Report Number 147* 2013; [https://www.ers.usda.gov/webdocs/publications/err147/36939\\_err147.pdf](https://www.ers.usda.gov/webdocs/publications/err147/36939_err147.pdf). Accessed 06 Jan 17.
6. Basu S, Wimer C, Seligman H. Moderation of the Relation of County-Level Cost of Living to Nutrition by the Supplemental Nutrition Assistance Program. *American journal of public health*. Nov 2016;106(11):2064-2070.
7. Xiang Y, Gubian S, Suomela B, Hoeng J. Generalized Simulated Annealing for Efficient Global Optimization: the GenSA Package for R. *The R Journal*. 2013;5(1).
8. Greevy R, Lu B, Silber J, Rosenbaum P. Optimal Multivariate Matching Before Randomization. *Biostatistics*. 2004;5(2):253-275.
9. Kaiser Family Foundation. Medicaid Spending per Enrollee (Full or Partial Benefit). 2016; <http://kff.org/medicaid/state-indicator/medicaid-spending-per-enrollee/?currentTimeframe=0>. Accessed 09 Dec 16.
10. Falk G. Temporary Assistance for Needy Families (TANF): Eligibility and Benefit Amounts in State TANF Cash Assistance Programs. 2014; <https://fas.org/sgp/crs/misc/R43634.pdf>. Accessed 09 Dec 16.
11. The Dartmouth Atlas of Health Care. General Atlas Rates. 2016; <http://www.dartmouthatlas.org/tools/downloads.aspx>. Accessed 01 Oct 16.
12. Edwards ST, Prentice JC, Simon SR, Pizer SD. Home-based primary care and the risk of ambulatory care-sensitive condition hospitalization among older veterans with diabetes mellitus. *JAMA internal medicine*. Nov 2014;174(11):1796-1803.
13. Terza JV, Basu A, Rathouz PJ. Two-stage residual inclusion estimation: addressing endogeneity in health econometric modeling. *Journal of health economics*. May 2008;27(3):531-543.
14. Glynn AN, Quinn KM. An Introduction to the Augmented Inverse Propensity Weighted Estimator. *Political Analysis*. 2010;18:36-56.
15. Imai K, Ratkovic M. Covariate balancing propensity score. *Journal of the Royal Statistical Society: Series B (Statistical Methodology)*. 2014;76(1):243-263.



**eFigure 1.** Change in estimated difference between participating and not participating in SNAP, in a series of nested models to explore potential confounders

**Model**

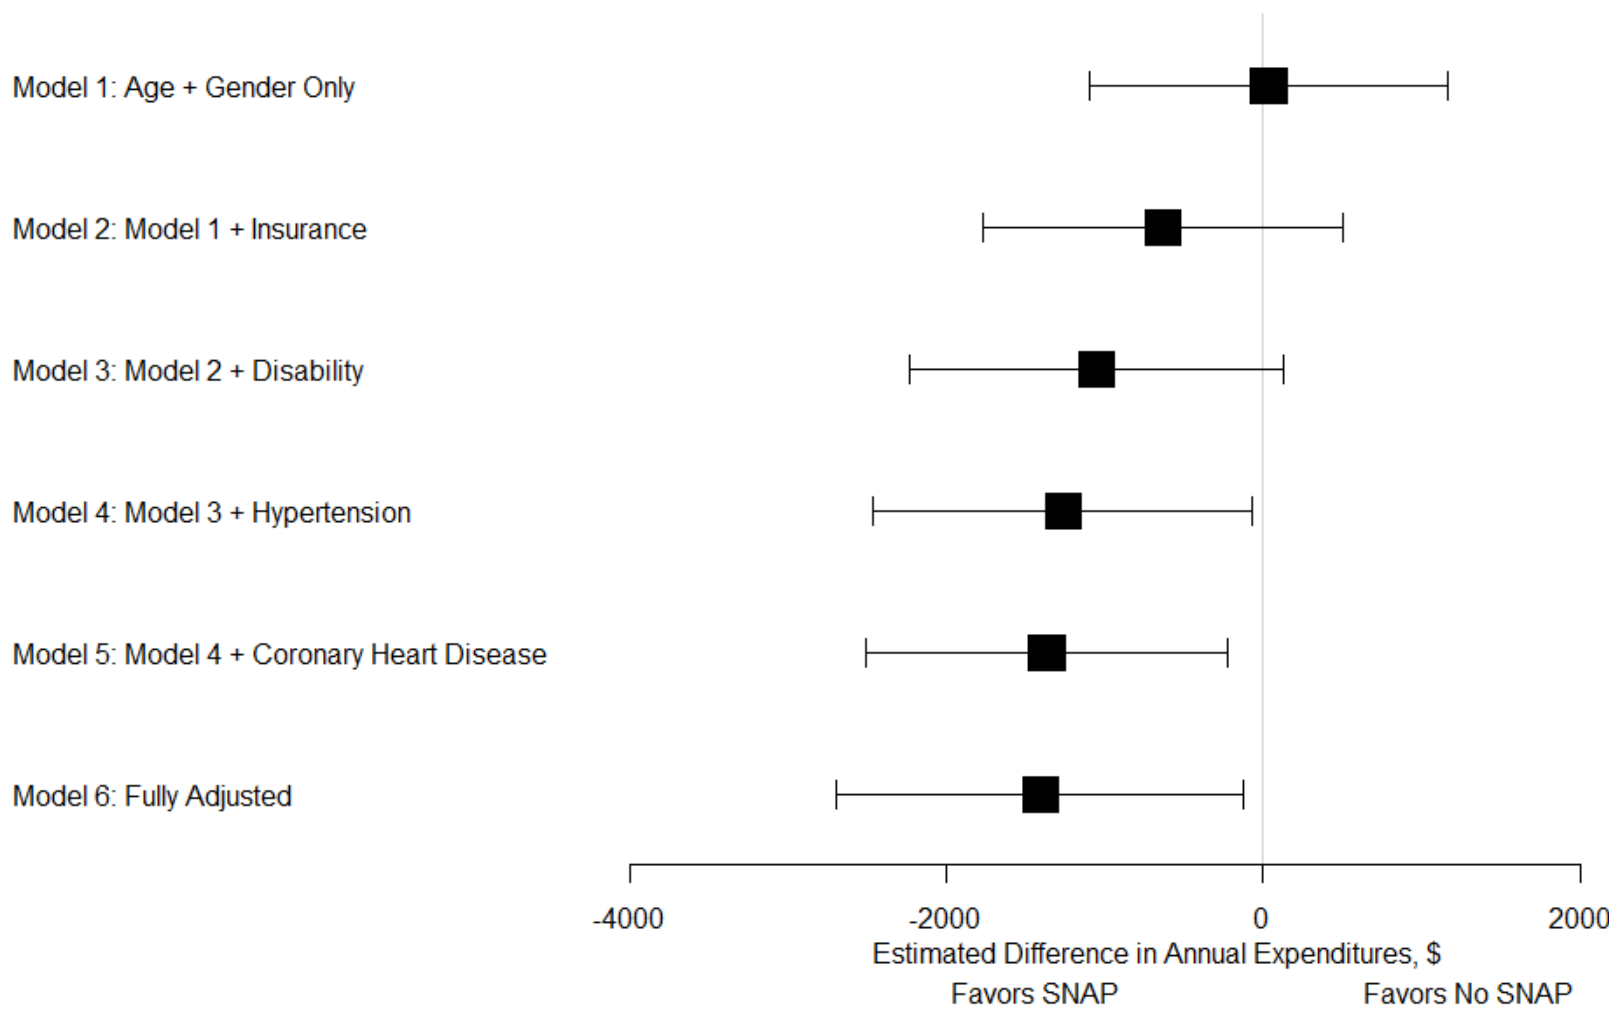

Supplement: jamainternmed-177-1642-s001.pdf [file jamainternmed-177-1642-s001.pdf]
